# Supplementary material
Source: publisher site journal article supplement (https://www.dovepress.com/article/427624)
Supplement: Supplementary file 1 [file get_supplementary_file.php]

## Supplementary Figure 1

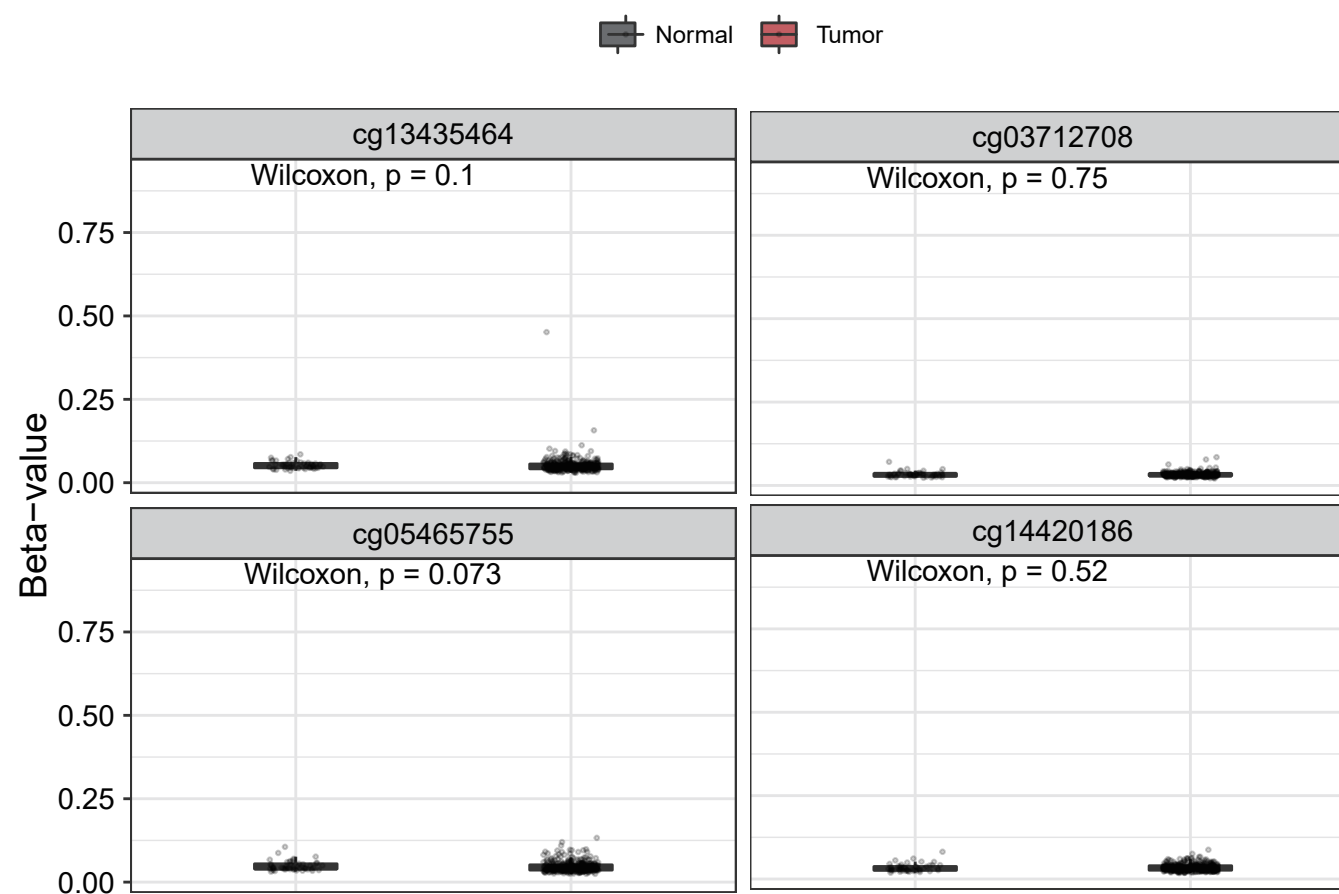

Supplement Figure 1. Expression of CKS2 gene methylation at different CpG sites in normal and tumor tissues.

## Supplementary Figure 2

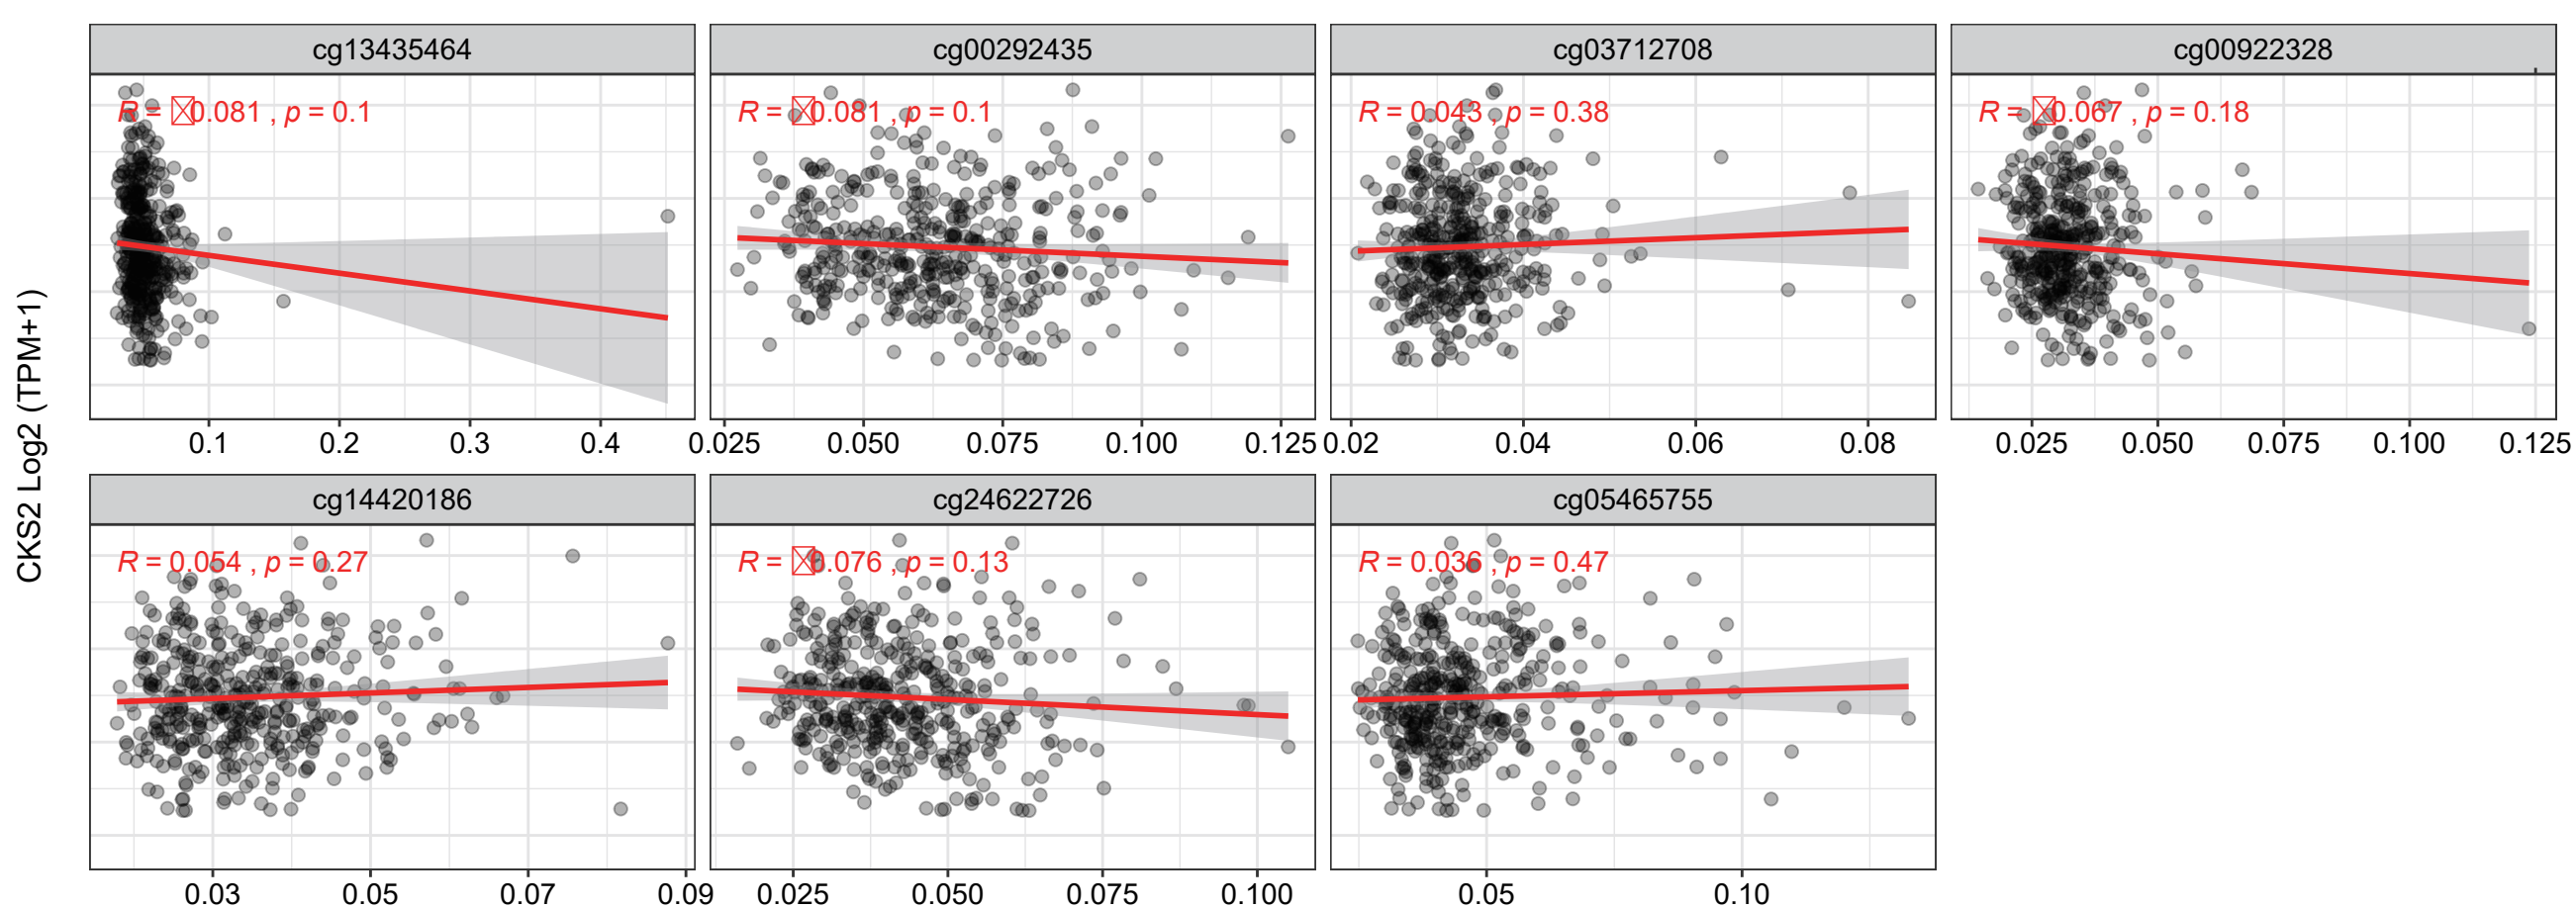

Supplement Figure 2. Correlation between CKS2 expression and methylation levels at different CpG sites.

## Supplementary Figure 3

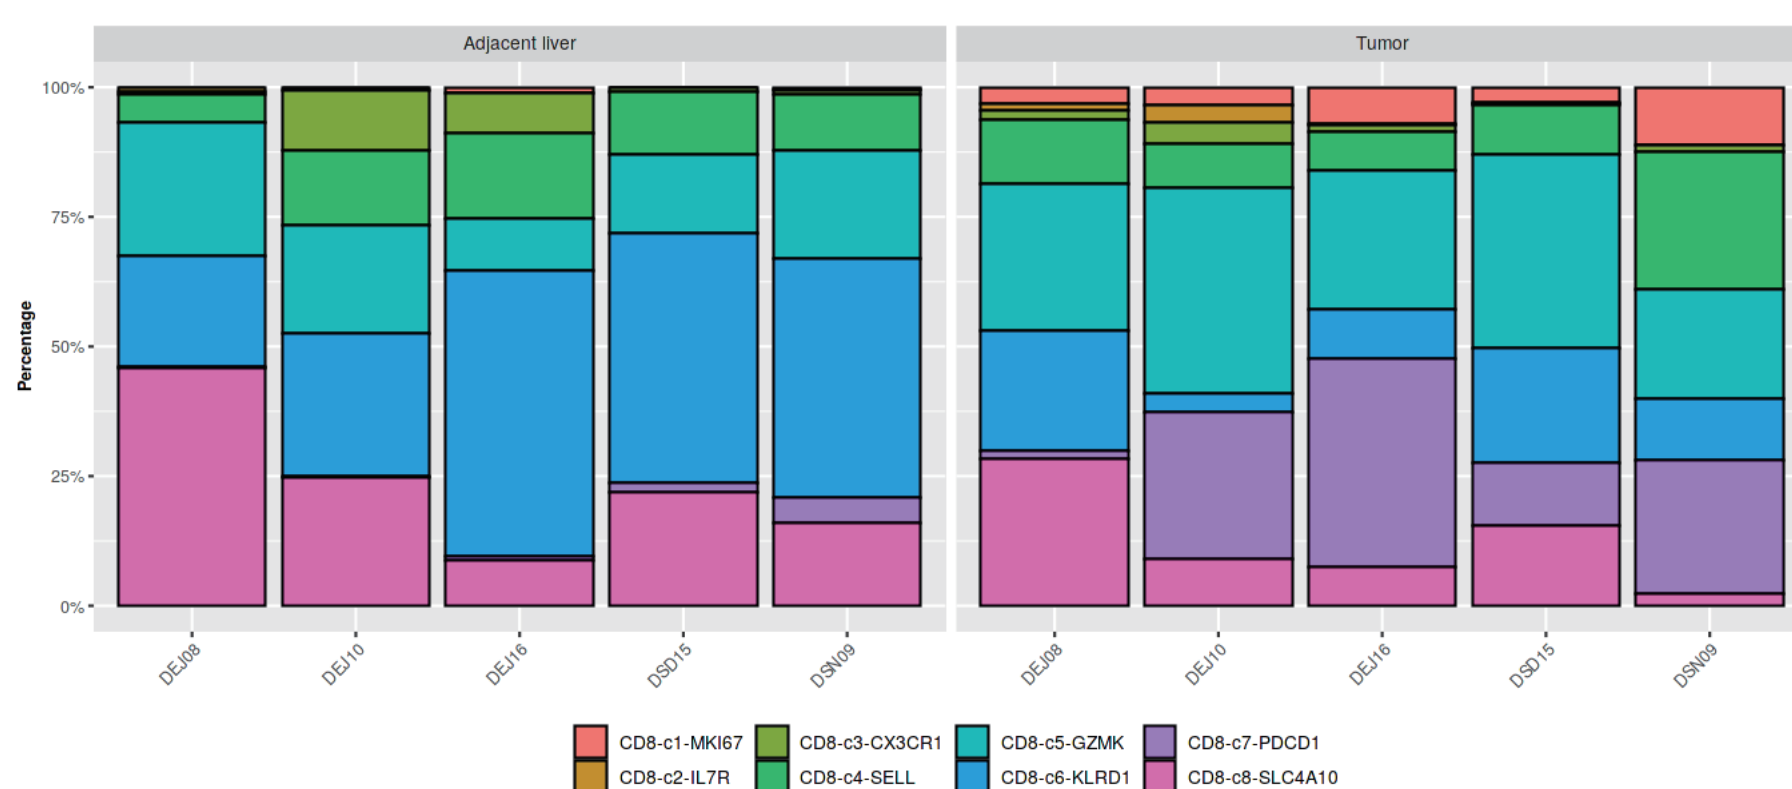

Supplement Figure 3. Proportions of different CD8+T cells in adjacent tissues and tumors via Single Cell Sequencing Database.

CD8-c1-MKI67 refers to the expression of MKI67 on the surface of CD8+T cells, representing proliferative T cells.  
 CD8-c2-IL7R refers to the expression of IL7R on the surface of CD8+T cells, representing naive T cells.  
 CD8-c3-CX3CR1 refers to the expression of CX3CR1 on the surface of CD8+T cells, representing T cells with effector functions.  
 CD8-c4-SELL and CD8-c5-GZMK refer to the high expression of SELL and GZMK on the surface of CD8+T cells respectively, representing effector memory T cells.  
 CD8-c6-KLRD1 refers to the high expression of KLRD1 on the surface of CD8+T cells, representing T cells with effector functions.  
 CD8-c7-PDCD1 refers to the high expression of PDCD1 on the surface of CD8+T cells, representing exhausted CD8+T cells.  
 CD8-c8-SLC4A10 refers to the specific expression of SLC4A10 on the surface of CD8+T cells, representing mucosal-associated invariant T cells (MAIT).
